# Supplementary material for: Effects of temperature on metabolic scaling in black carp
Source: PeerJ journal article supplement (doi:10.7717/peerj.9242), 2020-05-27

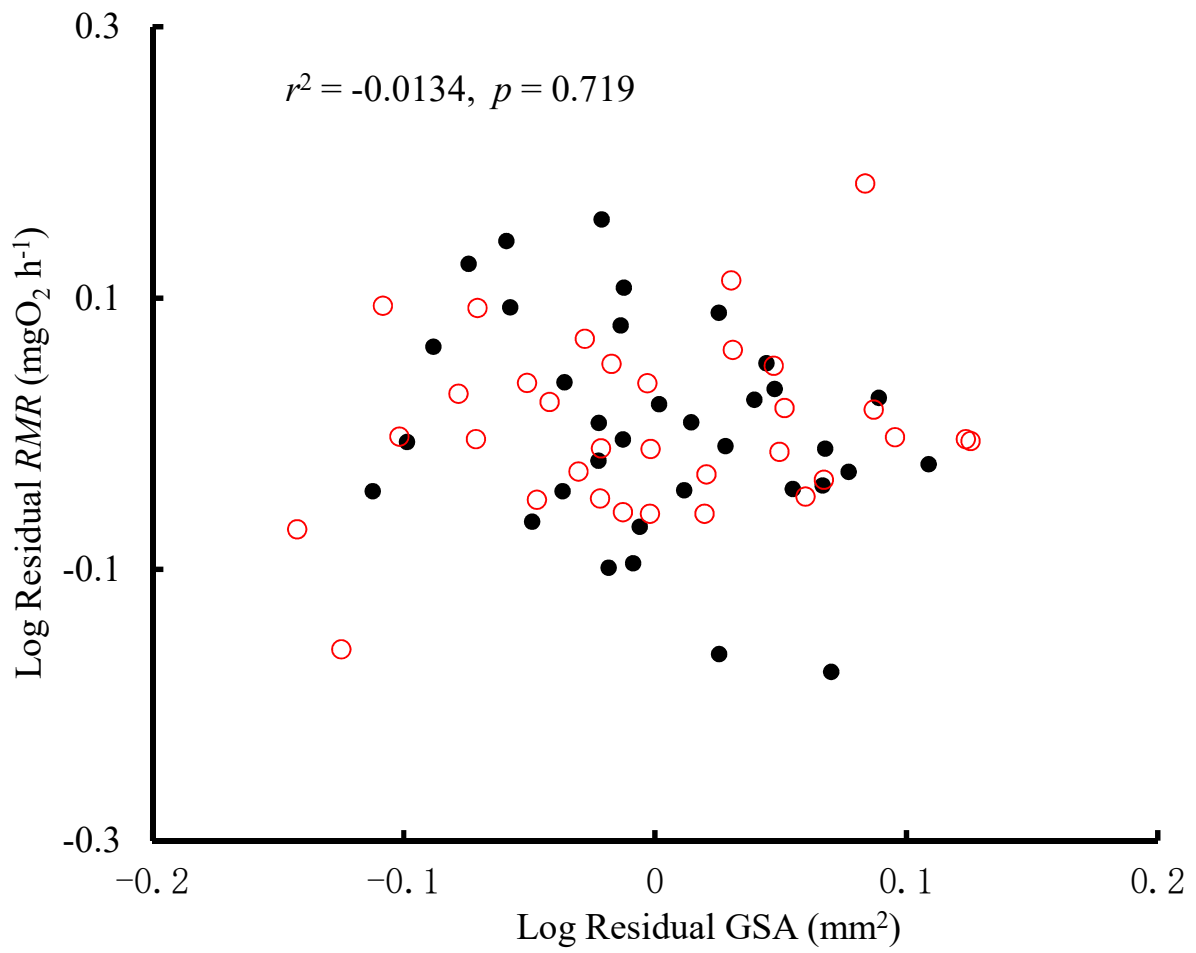

Supplement: Figure_S1.pdf [file Figure_S1.pdf]
